# Supplementary material for: A Parkinson's disease CircRNAs Resource reveals a link between circSLC8A1 and oxidative stress
Source: PubMed Central journal article supplement (PMC7507321; doi:10.15252/emmm.201911942), 2020-07-26
Supplement: EMMM-12-e11942-s001.pdf [file EMMM-12-e11942-s001.pdf]

## **Appendix document**

### **Table of Content:**

1. Appendix figure S1: RNA Editing is not correlated to gender and age.
2. Appendix figure S2: No positive correlation between age and circRNA expression in MTG or Amygdala control and PD samples.
3. Appendix figure S3: CircSLC8A1 expression in differentiating ES cells, Ago2-immunoprecipitation validation and miR-128 levels in SN and under oxidation.

**Appendix figure S1: RNA Editing is not correlated to gender and age:**

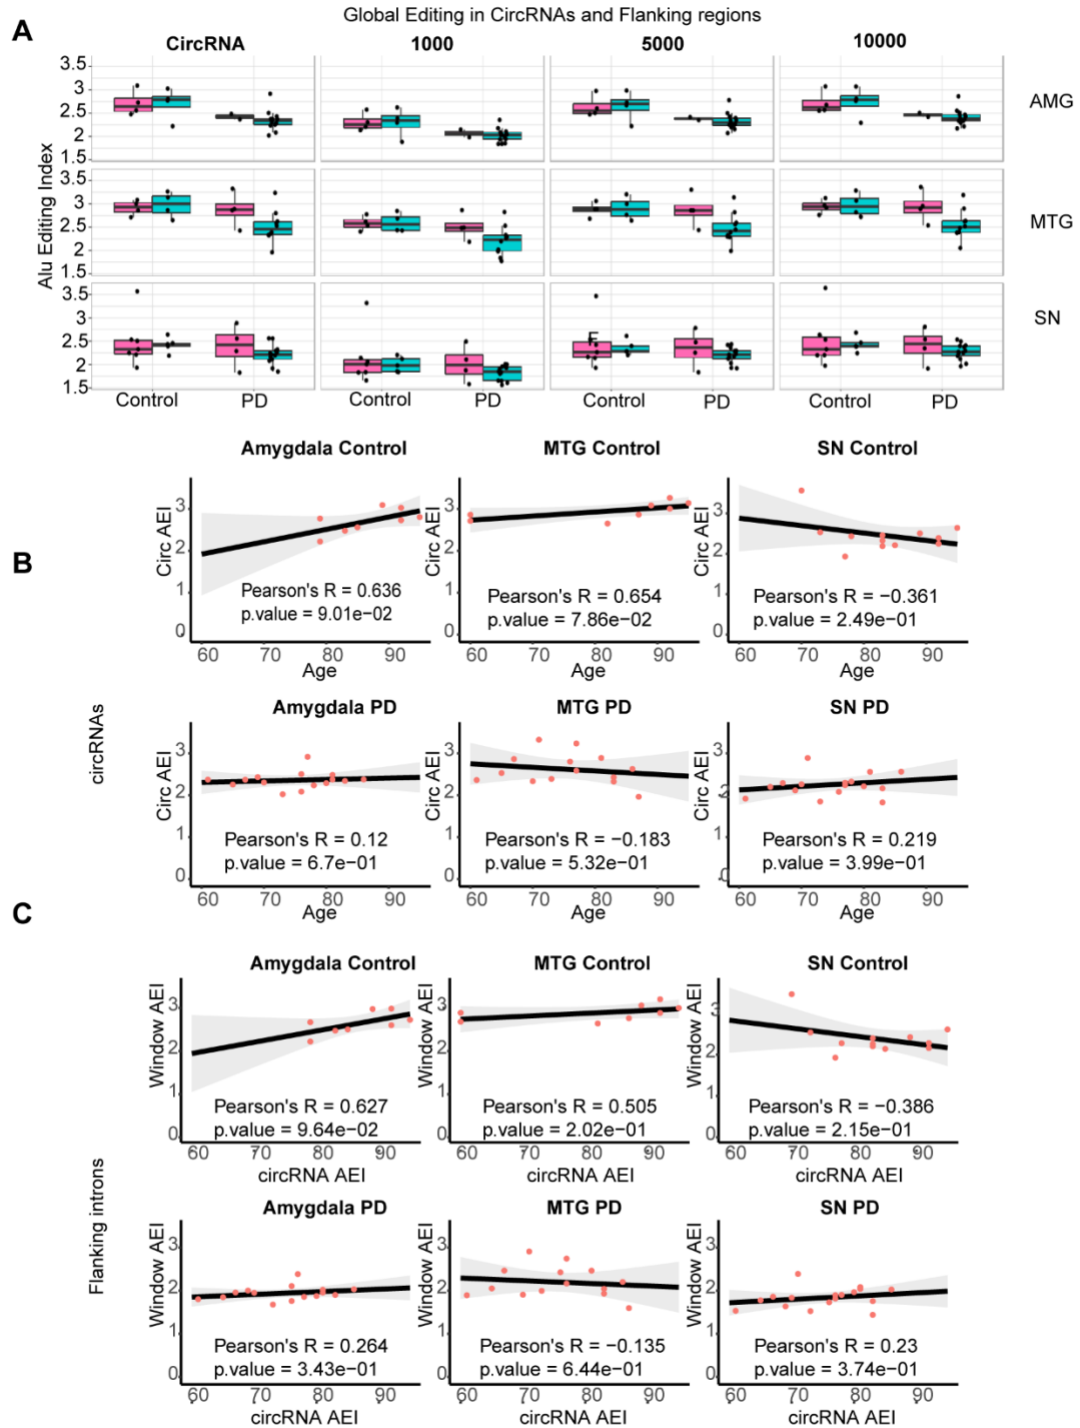

**Appendix figure S1: RNA Editing is not correlated to gender and age**

(A) RNA editing is not correlated to gender: no statistically significant differences were shown between male & female (T-test  $p=0.56$  for control or  $0.26$  for PD), female marked in pink and males in cyan.  $n=8$  for Amygdala control, 15 for Amygdala PD, 8 for MTG control and 13 for MTG PD, 10 for SN control and 15 for SN PD. The box is drawn from Q1 to Q3 with a horizontal line drawn in the middle to denote the median. Whiskers mark minimum or maximum values.

(B-C) RNA editing levels are not correlated to age as measured in circRNAs or in the flanking introns: no statistically significant correlation by Wilcoxon test was found between age and AEI in any of the tested groups.

**Appendix figure S2: No positive correlation between age and circRNA expression in MTG or Amygdala control and PD samples**

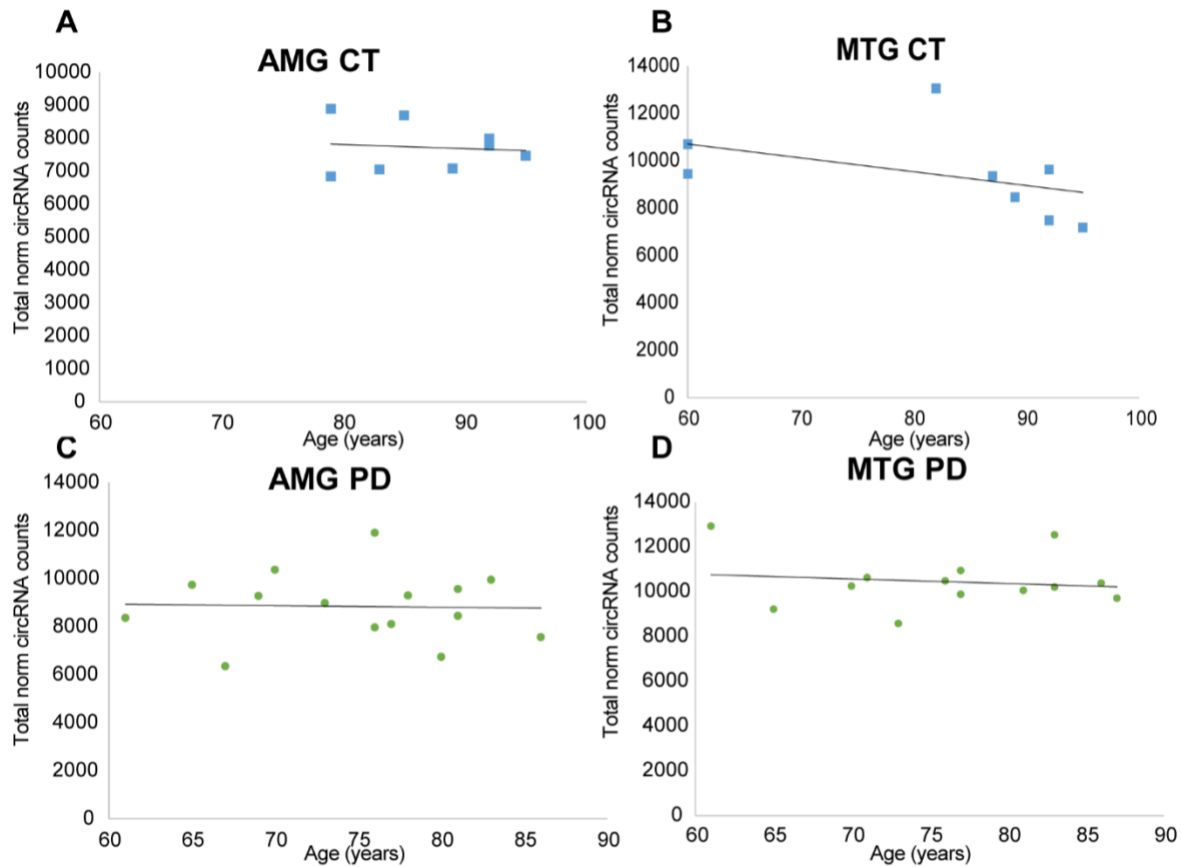

**Appendix figure S2: No positive correlation between age and circRNA expression in MTG or Amygdala control and PD samples:**

(A-D) no correlation in control or PD samples of Amygdala or MTG (Correlation test p value  $p=0.81$  and  $p=0.91$  for CT and PD AMG and  $p=0.27$  and  $0.65$  for CT and PD in MTG),  $n=8$  for AMG CT, 8 for MTG CT, 15 for AMG PD and 13 for MTG PD.

**Appendix figure S3: CircSLC8A1 expression in differentiating ES cells, AgoIP validation and miR-128 levels in SN and under oxidation**

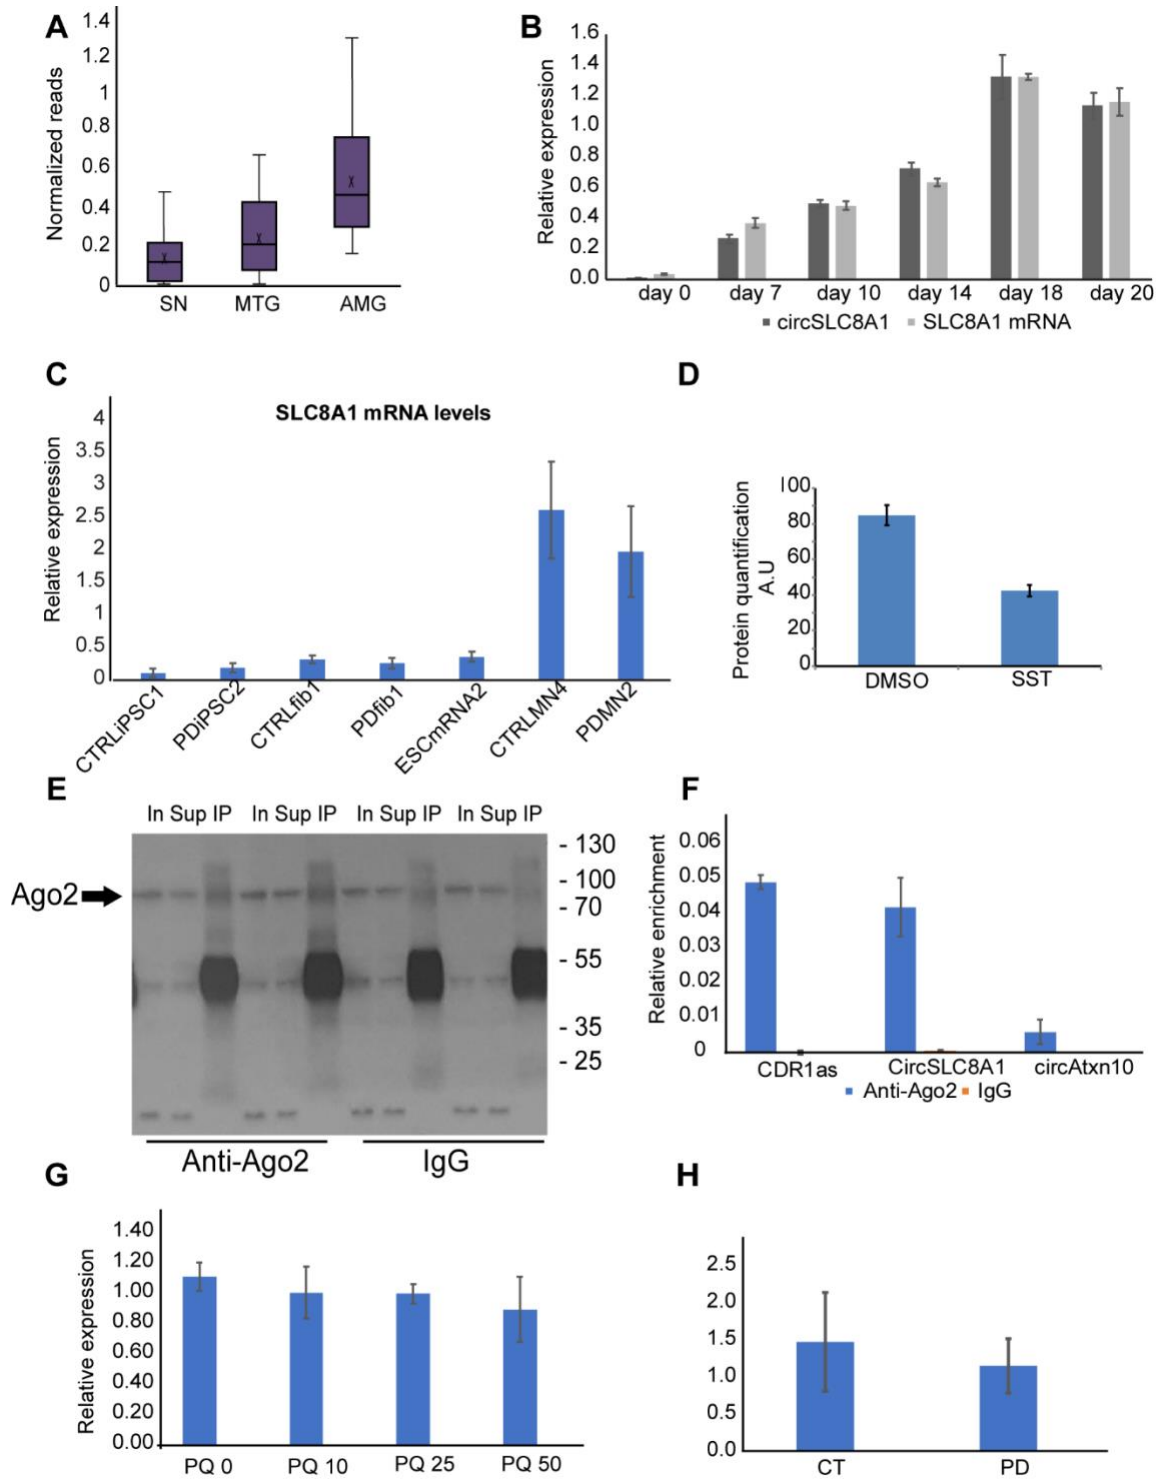

**Appendix figure S3: CircSLC8A1 expression in differentiating ES cells, AgoIP validation and miR-128 levels in SN and under oxidation**

(A) circSLC8A1 levels in the three testes brain regions. n=8 for Amygdala control, 15 for Amygdala PD, 8 for MTG control and 13 for MTG PD, 10 for SN control and 15 for SN PD. The box is drawn from Q1 to Q3 with a horizontal line drawn in the middle to denote the median and x marks the average. Whiskers mark minimum or maximum values.

(B) circRNA abundance (left) and SLC8A1 mRNA expression (right) in differentiating human ES cells. n=2 biological replicas for each condition. Data presented as mean  $\pm$  SD.

(C) published datasets show upregulated linear SLC8A1 expression in iPSCs differentiation from healthy and PD fibroblasts into neurons, with in no significant difference in SLC8A1 levels between control and PD samples. n=5 for control fibroblasts, 9 for PD fibroblasts, 6 Control iPSC, 7 PD iPSC, 2 ESCs, 5 Control motor neurons and 6 PD motor neurons. p values calculated by T-test. Data presented as mean  $\pm$  SD.

(D) quantification of IHC staining using anti-SLC8A1 in SH-SY cells. 10 randomly selected regions of interest (ROIs) from each slide were imaged taking a z-stack of 20um depth to cover the entire area of the cells, 84 cells were analyzed for DMSO and 87 for STT. Data presented as mean  $\pm$  SD.

(E) WB of Ago2-Immunoprecipitation or IgG control from SHSY cells: Input (In), Sup and pellet (IP). black arrow marks Ago2 band.

(F) qPCR of Ago2-bound RNA and IgG negative control showing circSLC8A1, circCDR1as as a positive control and circATXN10 as negative control. n=3 biological replicas for each condition, Data presented as mean  $\pm$  SD.

(G) miR-128 levels expression in SHSY cells treated with PQ. n=3 biological replicas for each condition. Data presented as mean  $\pm$  SD.

(H) miR-128 levels expression in SN of control and PD brains. n=12 for control SN and 17 for PD SN. Data presented as mean  $\pm$  SD.
