# Supplementary material for: A Parkinson's disease CircRNAs Resource reveals a link between circSLC8A1 and oxidative stress
Source: PubMed Central journal article supplement (PMC7507321; doi:10.15252/emmm.201911942), 2020-07-26
Supplement: EMMM-12-e11942-s002.pdf [file EMMM-12-e11942-s002.pdf]

# Expanded View Figures

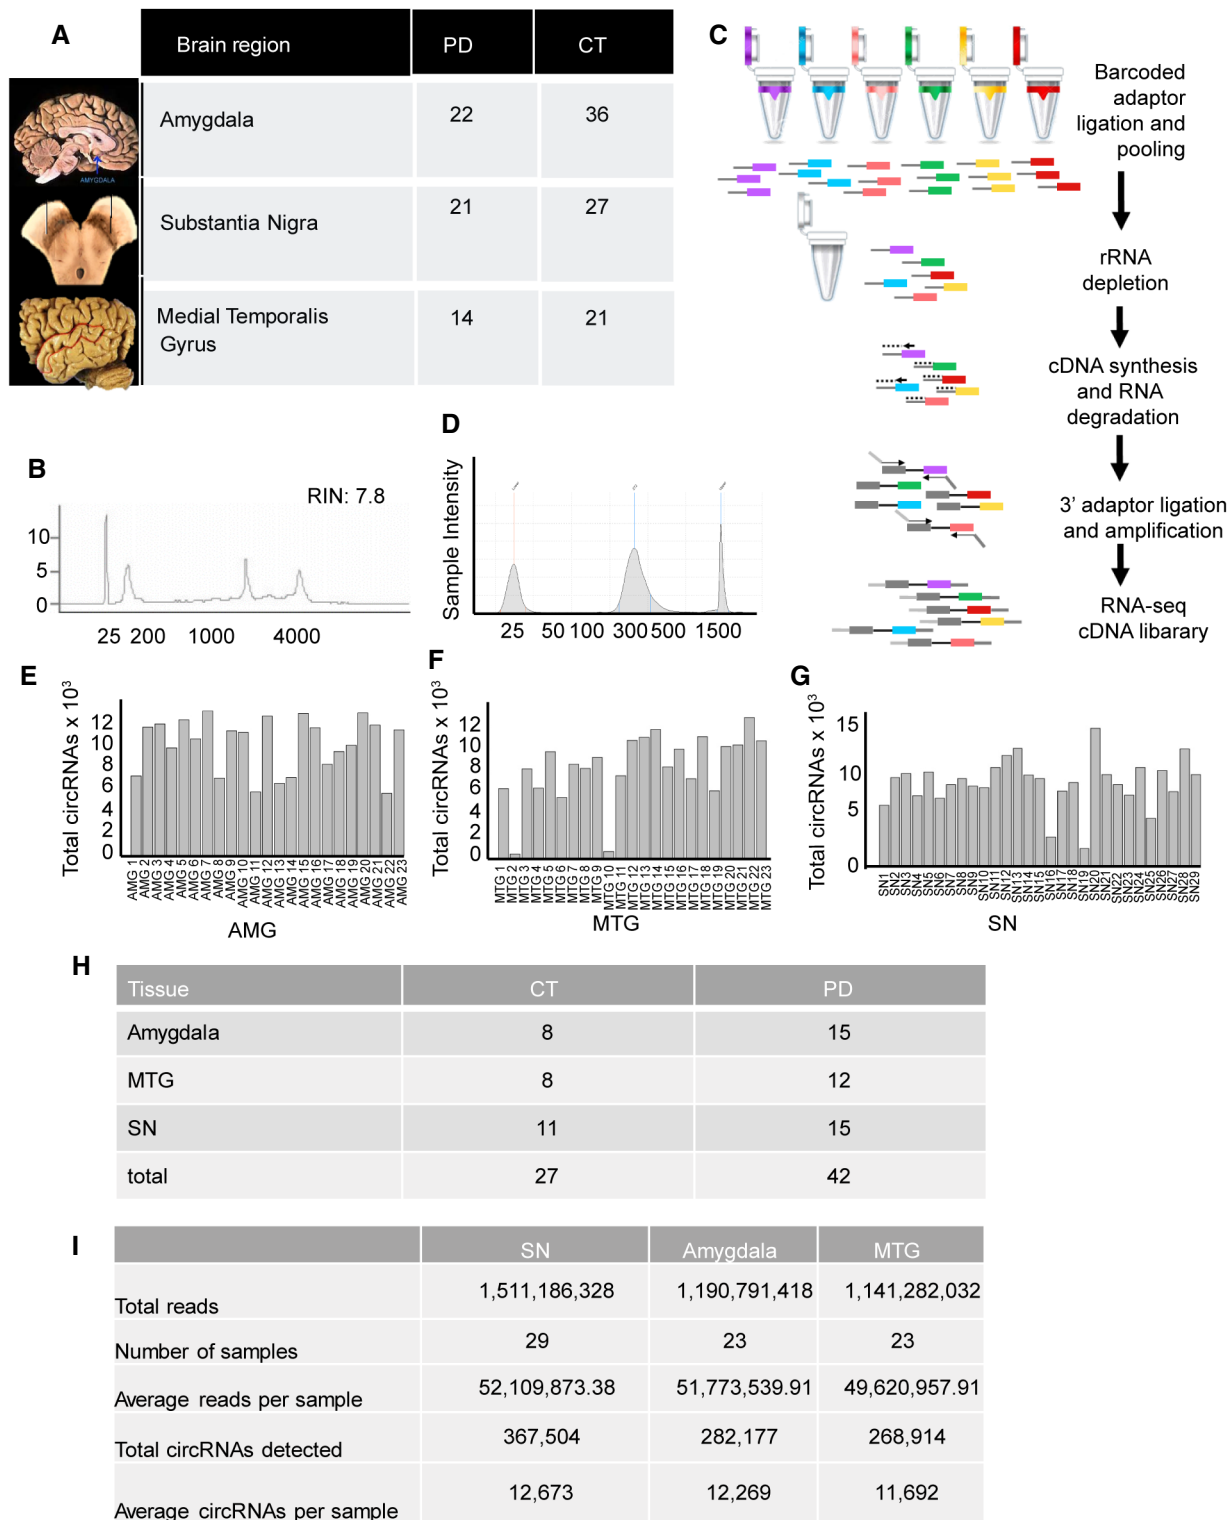

Figure EV1.

**Figure EV1. Tissues retrieved and experimental in-house RNA sequencing methodology.**

- A Brain region origin of tissues retrieved from the NBB detailing each brain area.
- B Average RIN plot of RNA prepared from the frozen tissues.
- C Library preparation key steps (see details in Materials and Methods).
- D Library plot in a TapeStation run.
- E–G Number of circRNAs detected in each sample of all 3 regions. Samples with < 5,000 circRNAs were removed from the analysis.
- H Number of samples from PD and control from each tissue that were included in the analysis.
- I Number of total reads and circRNAs from each tissue.



**Figure EV2. PCA analysis of all tissues and of PD vs control samples, WGCNA analysis QC, clustering of the samples and modules.**

- A PCA of all mRNA samples from all tissues.
- B Substantia nigra sample heatmap, relative expression of each gene is represented by colors, marked by the color key: Reduction in expression is represented by light green and elevation is represented by blue.
- C, D PCA plot of control vs PD samples in the amygdala and MTG.
- E Sample dendrogram showing sample clustering and the different classification patterns of external traits for each sample.
- F Cluster dendrogram of all genes.
- G, H  $\log_2$  fold change and  $-\log P$  value of known DE splicing factors in PD SN vs control SN.  $n = 10$  for SN control and 15 for SN PD. Data presented as mean  $\pm$  SD, Walt test (DEseq2 analysis).

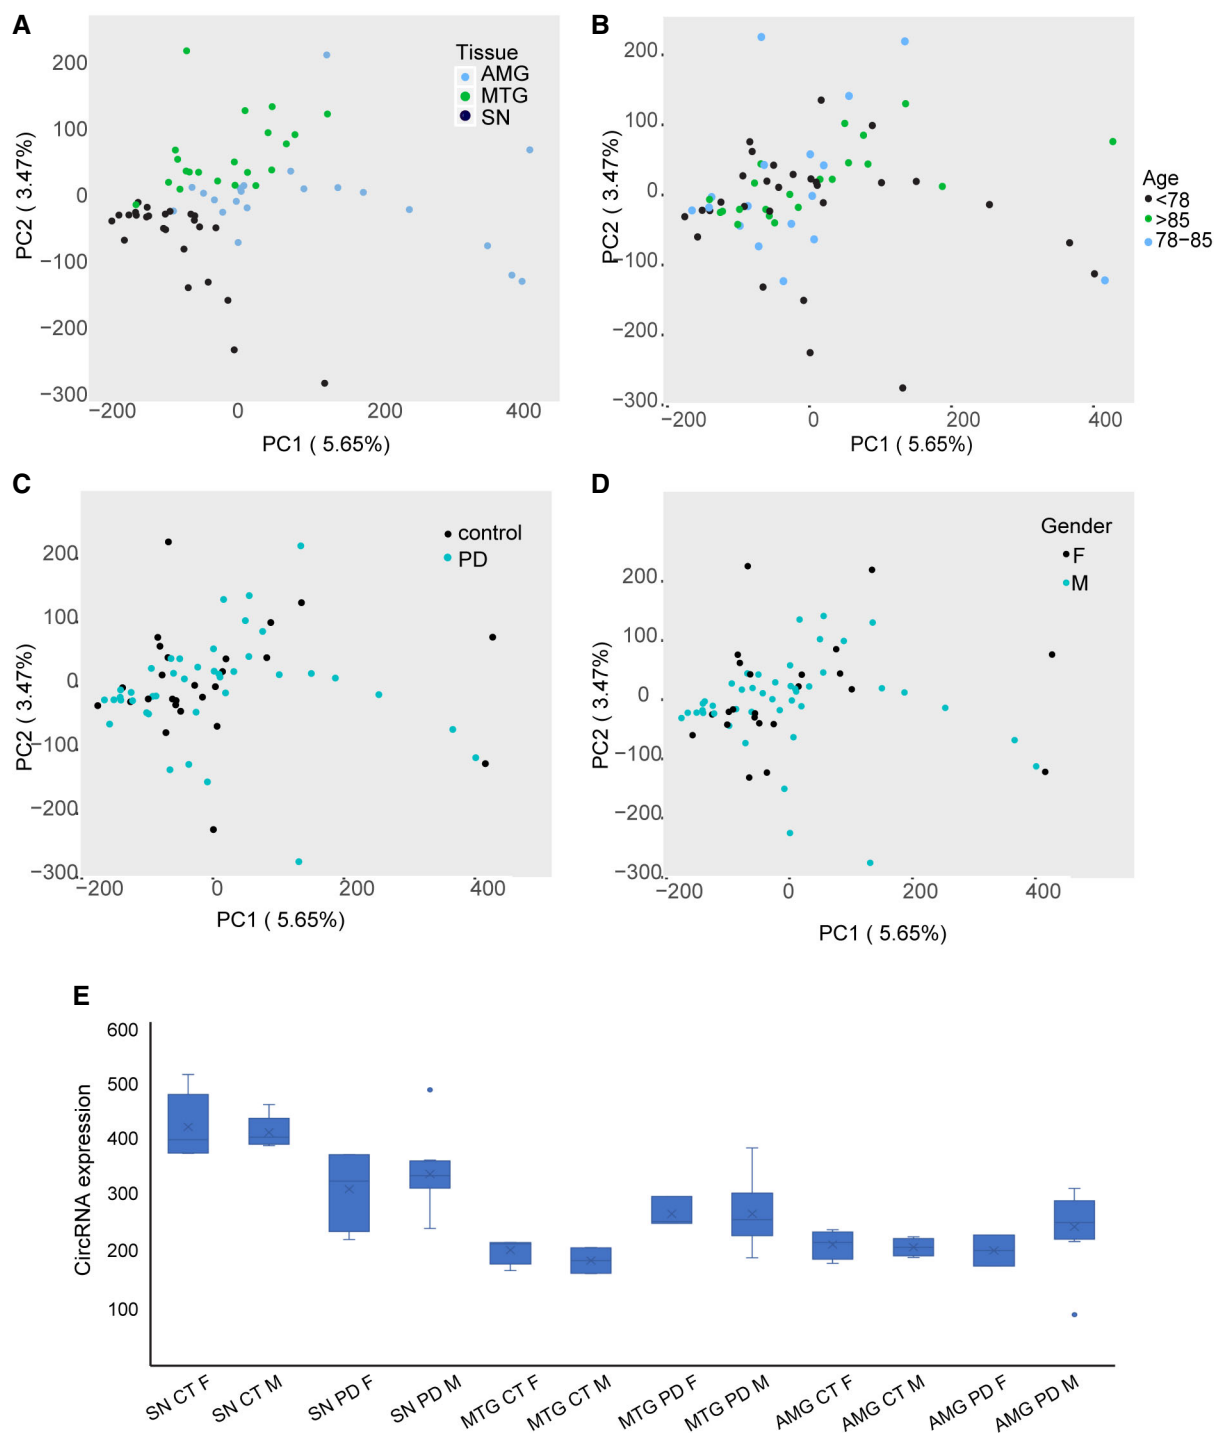

**Figure EV3. PCA analysis of circRNA profile.**

A–D PCA analysis of circRNA profiles in samples according to specific tissues, age, condition, and gender.

E CircRNA abundance does not change in a gender-specific manner in the tested tissues.  $n = 23$  for females and 46 for males. The box is drawn from Q1 to Q3 with a horizontal line drawn in the middle to denote the median and x marks the average. Whiskers mark minimum or maximum values.

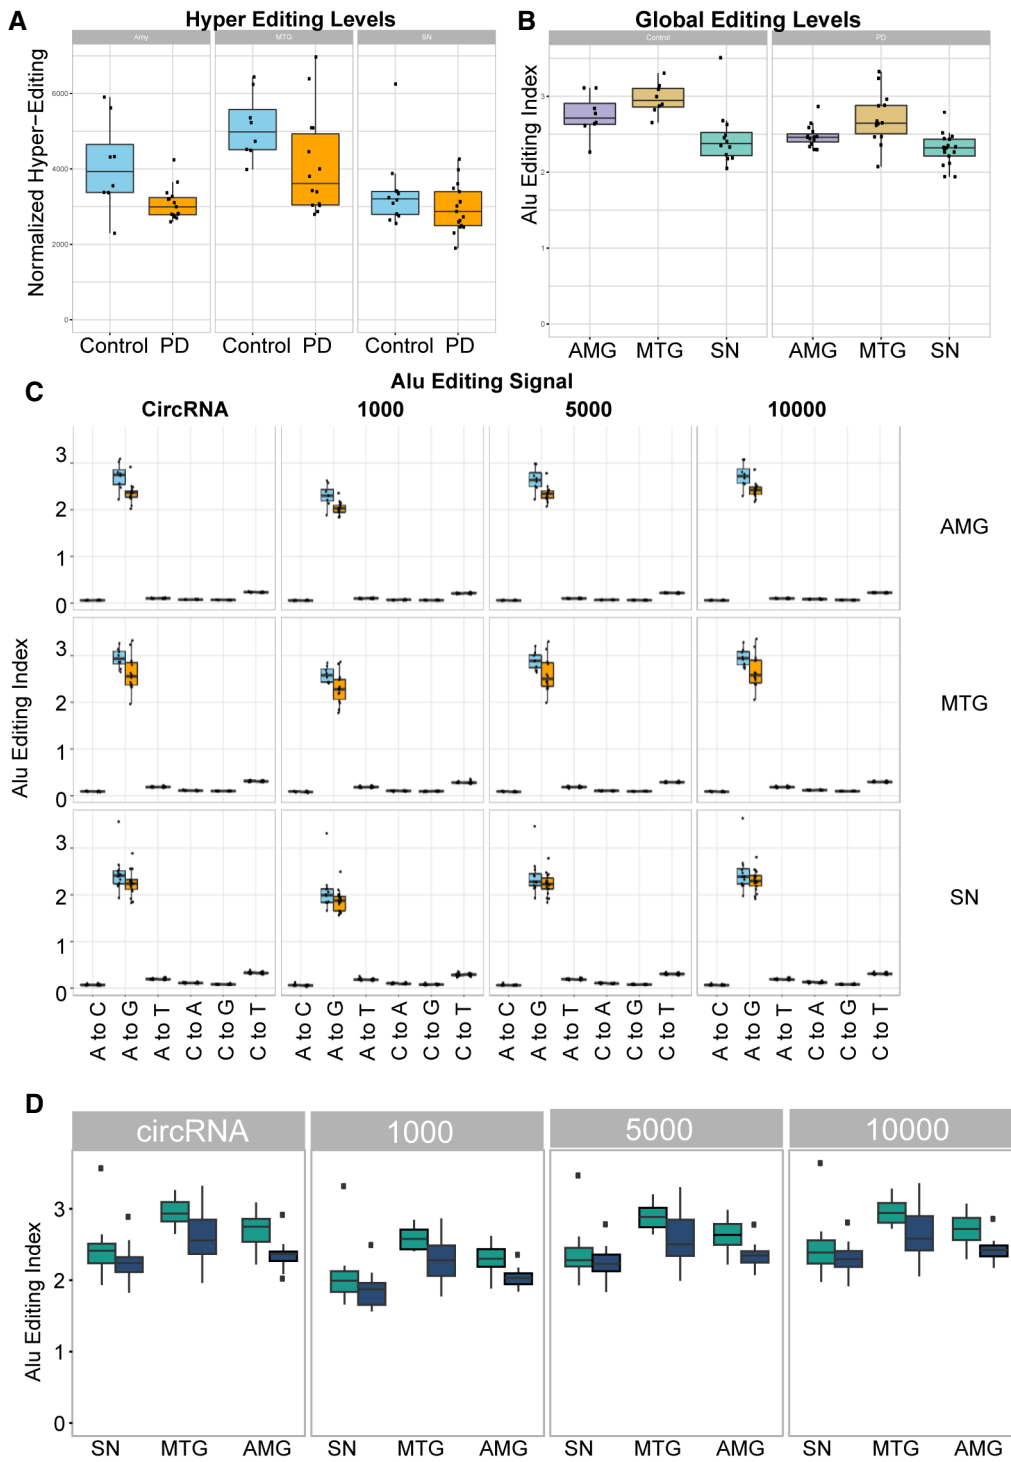

Figure EV4.

**Figure EV4. RNA Editing in PD sample and controls.**

- A Hyper-editing levels in all 3 tissues, PD, and controls,  $n = 8$  for amygdala control, 15 for amygdala PD, 8 for MTG control and 13 for MTG PD, 10 for SN control and 15 for SN PD. The box is drawn from Q1 to Q3 with a horizontal line drawn in the middle to denote the median and x marks the average. Whiskers mark minimum or maximum values.
- B Global editing levels measured by *Alu* editing index comparing the three different tissues in PD or control,  $n = 8$  for amygdala control, 15 for amygdala PD, 8 for MTG control and 13 for MTG PD, 10 for SN control and 15 for SN PD. The box is drawn from Q1 to Q3 with a horizontal line drawn in the middle to denote the median and x marks the average. Whiskers mark minimum or maximum values.
- C *Alu* editing index showing that A-to-G mismatch is the most dominant, as other mismatches are a result of noise or other biological mechanisms and should be much lower than the A-to-I (viewed as A-to-G) RNA editing signal,  $n = 8$  for amygdala control, 15 for amygdala PD, 8 for MTG control and 13 for MTG PD, 10 for SN control and 15 for SN PD. The box is drawn from Q1 to Q3 with a horizontal line drawn in the middle to denote the median and x marks the average. Whiskers mark minimum or maximum values.
- D *Alu* editing index in circRNAs and flanking introns, in 3 different intron windows: 1,000, 5,000, and 10,000 nucleotides,  $n = 8$  for amygdala control, 15 for amygdala PD, 8 for MTG control and 13 for MTG PD, 10 for SN control and 15 for SN PD. The box is drawn from Q1 to Q3 with a horizontal line drawn in the middle to denote the median and x marks the average. Whiskers mark minimum or maximum values.

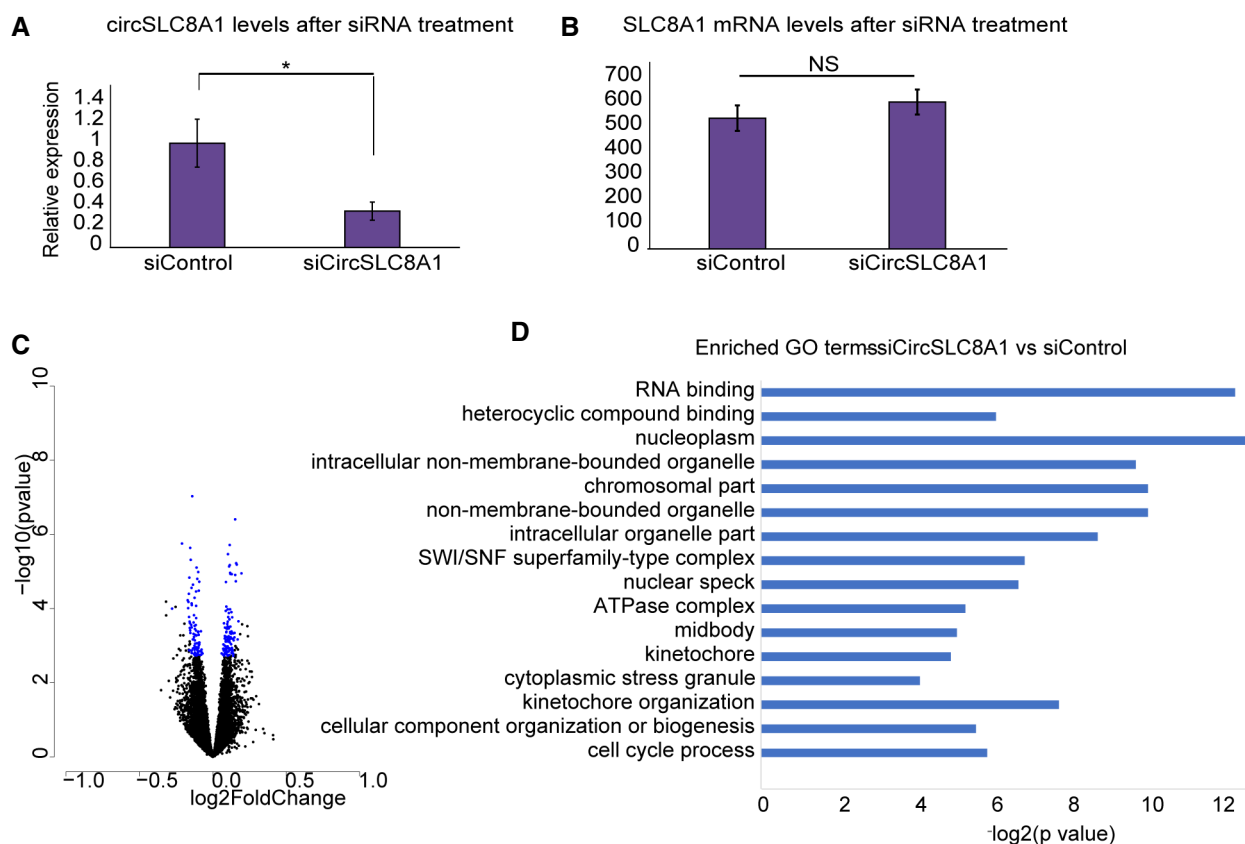**Figure EV5. Gene expression of circSLC8A1 knockdown.**

- A circSLC8A1 expression after siRNA treatment ( $t$ -test  $*P = 0.0075$ ),  $n = 3$  biological replicas for each condition. Data presented as mean  $\pm$  SD.
- B siRNA targeting circSLC8A1 does not affect SLC8A1 mRNA expression after siRNA treatment ( $t$ -test  $P > 0.05$ ),  $n = 6$  for each condition. Data presented as mean  $\pm$  SD.
- C Volcano plot of gene expression profile of siCircSLC8A1 compared to siControl, blue dots indicate corrected  $P < 0.05$ , FDR correction of Wald test (DEseq2 analysis).
- D Enriched Go terms of DE genes in siCircSLC8A1 compared to siControl analysis, FDR correction Wald test (DEseq2 analysis).
